# Supplementary material
Source: HighWire-hosted journal article supplement (https://www.annfammed.org/content/suppl/2018/09/07/16.5.436)
Supplement: Ebell_Supp_Apps.pdf [file Ebell_Supp_Apps.pdf]

**Supplemental materials for:**

Ebell MH, Barry HC, Shaughnessy AF, Slawson DC, Kulkarni N, Speer L. Top 20 POEMs of the Past 20 Years: A Survey of Practice-Changing Research for Family Physicians. *Ann Fam Med*. 2018;16(5):436-439.

## Supplemental Appendix 1. Journals currently reviewed monthly for POEMs.

Academic Emergency Medicine  
Acta Orthopaedica  
Age and Ageing  
Alimentary Pharmacology & Therapeutics  
American Heart Journal  
American Journal of Emergency Medicine  
American Journal of Gastroenterology  
American Journal of Medicine  
American Journal of Obstetrics and Gynecology  
American Journal of Ophthalmology  
American Journal of Preventive Medicine  
American Journal of Psychiatry  
American Journal of Public Health  
American Journal of Respiratory and Critical Care Medicine  
American Journal of Sports Medicine  
American Journal of Surgery  
Annals of Emergency Medicine  
Annals of Family Medicine  
Annals of Internal Medicine  
Annals of Surgery  
Annals of the Rheumatic Diseases  
Antimicrobial Agents and Chemotherapy  
Archives of Disease in Childhood  
Arthritis & Rheumatology  
Arthroscopy  
Birth  
BJOG  
BMC Family Medicine  
BMC Medicine  
BMJ  
Bone & Joint Journal  
British Journal of Dermatology  
British Journal of General Practice  
British Journal of Psychiatry  
British Journal of Surgery  
Canadian Family Physician  
Canadian Medical Association Journal  
Cancer  
Chest  
Circulation  
Clinical Otolaryngology  
Critical Care Medicine  
Diabetes  
Diabetes Care  
Diabetic Medicine  
Digestive Diseases and Sciences  
Diseases of the Colon & Rectum  
European Heart Journal  
Family Medicine  
Family Practice  
Fertility and Sterility  
Gastroenterology  
Gut  
Heart  
International Journal of Clinical Practice  
JAMA  
JAMA Dermatology  
JAMA Internal Medicine  
JAMA Neurology  
JAMA Ophthalmology  
JAMA Otolaryngology—Head & Neck Surgery  
JAMA Pediatrics  
JAMA Psychiatry  
JAMA Surgery  
Journal of Allergy and Clinical Immunology  
Journal of Bone and Joint Surgery, American Volume  
Journal of Bone and Joint Surgery, British Volume  
Journal of Clinical Endocrinology and Metabolism  
Journal of Clinical Epidemiology  
Journal of Clinical Pharmacology  
Journal of General Internal Medicine  
Journal of Hospital Medicine  
Journal of Pediatrics  
Journal of Physiotherapy  
Journal of Shoulder and Elbow Surgery  
Journal of the American Academy of Dermatology  
Journal of the American Board of Family Medicine  
Journal of the American College of Cardiology  
Journal of the American College of Surgeons  
Journal of the American Geriatrics Society  
Journal of the National Cancer Institute  
Journal of Urology  
Lancet  
Lancet Infectious Diseases  
Medical Care  
Medical Decision Making  
Medical Journal of Australia  
Medicine & Science in Sports & Exercise  
Neurology  
Neurosurgery  
New England Journal of Medicine  
Obstetrics and Gynecology  
Pain  
Pediatrics  
PLOS Medicine  
Preventive Medicine  
Rheumatology  
Scandinavian Journal of Gastroenterology  
Scandinavian Journal of Infectious Diseases  
Southern Medical Journal  
Stroke  
Thorax

Supplemental Appendix 2: Top 5 POEMs for each year from 1998 to 2017. Bold face indicates top scoring POEM for that year.

| Year        | Title of POEM                                                                          | Link to POEM in E                                                               |
|-------------|----------------------------------------------------------------------------------------|---------------------------------------------------------------------------------|
| <b>1998</b> | <b>Metformin best for obese type 2 diabetes mellitus (T2DM) (UKPDS 34)</b>             | <a href="http://www.essentialevidence.com">http://www.essentialevidence.com</a> |
| 1998        | Strict blood pressure control effective in T2DM (UKPDS 38)                             | <a href="http://www.essentialevidence.com">http://www.essentialevidence.com</a> |
| 1998        | Bupropion effective for smoking cessation                                              | <a href="http://www.essentialevidence.com">http://www.essentialevidence.com</a> |
| 1998        | Paroxetine effective for panic disorder                                                | <a href="http://www.essentialevidence.com">http://www.essentialevidence.com</a> |
| 1998        | Vena caval filters don't reduce mortality in high risk patients                        | <a href="http://www.essentialevidence.com">http://www.essentialevidence.com</a> |
| <b>1999</b> | <b>Beta-blockers effective in heart failure</b>                                        | <a href="http://www.essentialevidence.com">http://www.essentialevidence.com</a> |
| 1999        | Patches don't improve outcomes for corneal abrasion                                    | <a href="http://www.essentialevidence.com">http://www.essentialevidence.com</a> |
| 1999        | Smoking status on patient charts improves physician counseling                         | <a href="http://www.essentialevidence.com">http://www.essentialevidence.com</a> |
| 1999        | Tissue adhesive provides good wound repair                                             | <a href="http://www.essentialevidence.com">http://www.essentialevidence.com</a> |
| 1999        | Practice guidelines often unreliable                                                   | <a href="http://www.essentialevidence.com">http://www.essentialevidence.com</a> |
| <b>2000</b> | <b>3 years between Pap smears adequate for many women</b>                              | <a href="http://www.essentialevidence.com">http://www.essentialevidence.com</a> |
| 2000        | Bed rest is ineffective for treating anything                                          | <a href="http://www.essentialevidence.com">http://www.essentialevidence.com</a> |
| 2000        | PHQ 9 questionnaire valid for mental disorder screening                                | <a href="http://www.essentialevidence.com">http://www.essentialevidence.com</a> |
| 2000        | Treating isolated systolic hypertension in the elderly prevents adverse outcomes       | <a href="http://www.essentialevidence.com">http://www.essentialevidence.com</a> |
| 2000        | Tube feeding of no benefit in demented elderly                                         | <a href="http://www.essentialevidence.com">http://www.essentialevidence.com</a> |
| <b>2001</b> | <b>Managing rate and rhythm are similar for atrial fibrillation</b>                    | <a href="http://www.essentialevidence.com">http://www.essentialevidence.com</a> |
| 2001        | Lipid lowering drugs effective for primary prevention                                  | <a href="http://www.essentialevidence.com">http://www.essentialevidence.com</a> |
| 2001        | Steroids are beneficial to neonates in PPRM                                            | <a href="http://www.essentialevidence.com">http://www.essentialevidence.com</a> |
| 2001        | ACE inhibitor effective in migraine treatment                                          | <a href="http://www.essentialevidence.com">http://www.essentialevidence.com</a> |
| 2001        | Bupropion may be effective for adult attention deficit hyperactivity disorder          | <a href="http://www.essentialevidence.com">http://www.essentialevidence.com</a> |
| <b>2002</b> | <b>Hormone replacement overall not beneficial (WHI)</b>                                | <a href="http://www.essentialevidence.com">http://www.essentialevidence.com</a> |
| 2002        | Delayed prescriptions reduce antibiotic use                                            | <a href="http://www.essentialevidence.com">http://www.essentialevidence.com</a> |
| 2002        | Cholesterol and blood pressure lowering most important in diabetics                    | <a href="http://www.essentialevidence.com">http://www.essentialevidence.com</a> |
| 2002        | Smoking cessation 6-8 weeks before surgery reduces complications                       | <a href="http://www.essentialevidence.com">http://www.essentialevidence.com</a> |
| 2002        | Rule to predict final warfarin dose in atrial fibrillation (5 mg)                      | <a href="http://www.essentialevidence.com">http://www.essentialevidence.com</a> |
| <b>2003</b> | <b>Self breast exam doesn't reduce mortality</b>                                       | <a href="http://www.essentialevidence.com">http://www.essentialevidence.com</a> |
| 2003        | Rate control better than rhythm control in atrial fibrillation (AFFIRM)                | <a href="http://www.essentialevidence.com">http://www.essentialevidence.com</a> |
| 2003        | Deep vein thrombosis in less than 1% if normal d-dimer and not high risk by Wells rule | <a href="http://www.essentialevidence.com">http://www.essentialevidence.com</a> |
| 2003        | Simvastatin useful as primary prevention of CAD (HPS)                                  | <a href="http://www.essentialevidence.com">http://www.essentialevidence.com</a> |
| 2003        | Ottawa ankle rules safely exclude fractures                                            | <a href="http://www.essentialevidence.com">http://www.essentialevidence.com</a> |
| <b>2004</b> | <b>Breast cancer screening results in overdiagnosis</b>                                | <a href="http://www.essentialevidence.com">http://www.essentialevidence.com</a> |
| 2004        | Saline nasal irrigation effective for frequent sinusitis                               | <a href="http://www.essentialevidence.com">http://www.essentialevidence.com</a> |
| 2004        | 3 year screening interval for Pap adequate for most patients                           | <a href="http://www.essentialevidence.com">http://www.essentialevidence.com</a> |
| 2004        | Delayed prescriptions for upper respiratory infection reduces antibiotic use           | <a href="http://www.essentialevidence.com">http://www.essentialevidence.com</a> |
| 2004        | 2 question screening for depression effective                                          | <a href="http://www.essentialevidence.com">http://www.essentialevidence.com</a> |
| <b>2005</b> | <b>Vaccine prevents HPV infection</b>                                                  | <a href="http://www.essentialevidence.com">http://www.essentialevidence.com</a> |
| 2005        | Vitamin E not helpful, perhaps harmful                                                 | <a href="http://www.essentialevidence.com">http://www.essentialevidence.com</a> |
| 2005        | Bed rest bad for back pain, ineffective for sciatica                                   | <a href="http://www.essentialevidence.com">http://www.essentialevidence.com</a> |
| 2005        | Early tympanostomy tubes do not improve outcomes after 3+ years                        | <a href="http://www.essentialevidence.com">http://www.essentialevidence.com</a> |
| 2005        | Rofecoxib increases risk of cardiovascular events                                      | <a href="http://www.essentialevidence.com">http://www.essentialevidence.com</a> |
| <b>2006</b> | <b>Mammography results in overdiagnosis</b>                                            | <a href="http://www.essentialevidence.com">http://www.essentialevidence.com</a> |
| 2006        | Delayed prescription for otitis media reduces unnecessary antibiotics                  | <a href="http://www.essentialevidence.com">http://www.essentialevidence.com</a> |
| 2006        | Diets: low carb equivalent to low fat for weight loss                                  | <a href="http://www.essentialevidence.com">http://www.essentialevidence.com</a> |
| 2006        | Test-and-treat best for primary care dyspepsia                                         | <a href="http://www.essentialevidence.com">http://www.essentialevidence.com</a> |
| 2006        | Omega 3 fats do not affect mortality                                                   | <a href="http://www.essentialevidence.com">http://www.essentialevidence.com</a> |
| <b>2007</b> | <b>Home glucose monitoring ineffective</b>                                             | <a href="http://www.essentialevidence.com">http://www.essentialevidence.com</a> |
| 2007        | No incremental benefit for PCI added to optimal medical for stable CAD                 | <a href="http://www.essentialevidence.com">http://www.essentialevidence.com</a> |
| 2007        | As needed steroid plus beta-agonist works well in mild persistent asthma               | <a href="http://www.essentialevidence.com">http://www.essentialevidence.com</a> |
| 2007        | Antiplatelet agents prevent preeclampsia                                               | <a href="http://www.essentialevidence.com">http://www.essentialevidence.com</a> |

|             |                                                                                                                                       |                                                                                 |
|-------------|---------------------------------------------------------------------------------------------------------------------------------------|---------------------------------------------------------------------------------|
| 2007        | Prednisolone but not acyclovir effective for Bell's palsy                                                                             | <a href="http://www.essentialevidence.com">http://www.essentialevidence.com</a> |
| <b>2008</b> | <b>Intensive control of blood sugar in T2DM may be harmful (ACCORD)</b>                                                               | <a href="http://www.essentialevidence.com">http://www.essentialevidence.com</a> |
| 2008        | Nuts, corn, and popcorn not associated with risk of diverticular disease                                                              | <a href="http://www.essentialevidence.com">http://www.essentialevidence.com</a> |
| 2008        | Self-monitoring ineffective in patients with diabetes                                                                                 | <a href="http://www.essentialevidence.com">http://www.essentialevidence.com</a> |
| 2008        | Surgery not effective for moderate/severe OA of knee                                                                                  | <a href="http://www.essentialevidence.com">http://www.essentialevidence.com</a> |
| 2008        | Sugar decreases pain signs in immunized infants                                                                                       | <a href="http://www.essentialevidence.com">http://www.essentialevidence.com</a> |
| <b>2009</b> | <b>PSA screening does not reduce mortality from prostate cancer (PLCO)</b>                                                            | <a href="http://www.essentialevidence.com">http://www.essentialevidence.com</a> |
| 2009        | No need to monitor bone mineral density after bisphosphonates started                                                                 | <a href="http://www.essentialevidence.com">http://www.essentialevidence.com</a> |
| 2009        | Steroids hasten sore throat symptom resolution in adults                                                                              | <a href="http://www.essentialevidence.com">http://www.essentialevidence.com</a> |
| 2009        | Mammography identifies many women who will not benefit from treatment                                                                 | <a href="http://www.essentialevidence.com">http://www.essentialevidence.com</a> |
| 2009        | Treatment of acute otitis media leads to subsequent ear infections                                                                    | <a href="http://www.essentialevidence.com">http://www.essentialevidence.com</a> |
| <b>2010</b> | <b>Statin + fenofibrate no better than statin alone in T2DM (ACCORD)</b>                                                              | <a href="http://www.essentialevidence.com">http://www.essentialevidence.com</a> |
| 2010        | Antivirals can prevent influenza but treatment of symptoms is less impressive                                                         | <a href="http://www.essentialevidence.com">http://www.essentialevidence.com</a> |
| 2010        | Blood pressure target of 120 no better than 140 in T2DM (ACCORD)                                                                      | <a href="http://www.essentialevidence.com">http://www.essentialevidence.com</a> |
| 2010        | Anterior cruciate ligament reconstruction not necessary for good clinical outcome                                                     | <a href="http://www.essentialevidence.com">http://www.essentialevidence.com</a> |
| 2010        | Acute-onset visual floaters and flashes and the risk for retinal detachment                                                           | <a href="http://www.essentialevidence.com">http://www.essentialevidence.com</a> |
| <b>2011</b> | <b>Rivaroxaban similar to warfarin for patients with NVAF</b>                                                                         | <a href="http://www.essentialevidence.com">http://www.essentialevidence.com</a> |
| 2011        | Mediterranean diet associated with reduced morbidity and mortality                                                                    | <a href="http://www.essentialevidence.com">http://www.essentialevidence.com</a> |
| 2011        | Rivaroxaban effective for acute deep vein thrombosis (EINSTEIN)                                                                       | <a href="http://www.essentialevidence.com">http://www.essentialevidence.com</a> |
| 2011        | Screening for breast cancer: false-positive rate is 60% over 10 years                                                                 | <a href="http://www.essentialevidence.com">http://www.essentialevidence.com</a> |
| 2011        | Following STOPP criteria can decrease adverse drug effects in older patients                                                          | <a href="http://www.essentialevidence.com">http://www.essentialevidence.com</a> |
| <b>2012</b> | <b>Therapy with antibiotics is an option for early uncomplicated acute appendicitis</b>                                               | <a href="http://www.essentialevidence.com">http://www.essentialevidence.com</a> |
| 2012        | CIN 2 among women younger than 25 likely to regress                                                                                   | <a href="http://www.essentialevidence.com">http://www.essentialevidence.com</a> |
| 2012        | Gut feelings have good negative predictive value for serious infection in children                                                    | <a href="http://www.essentialevidence.com">http://www.essentialevidence.com</a> |
| 2012        | Annual screening chest x-ray does not reduce lung cancer mortality                                                                    | <a href="http://www.essentialevidence.com">http://www.essentialevidence.com</a> |
| 2012        | Restriction of sodium may be harmful for patients with cardiovascular disease                                                         | <a href="http://www.essentialevidence.com">http://www.essentialevidence.com</a> |
| <b>2013</b> | <b>Fasting not necessary before lipid panels</b>                                                                                      | <a href="http://www.essentialevidence.com">http://www.essentialevidence.com</a> |
| 2013        | Steroid injection for lateral epicondylitis worse than saline after 1 year                                                            | <a href="http://www.essentialevidence.com">http://www.essentialevidence.com</a> |
| 2013        | Probiotics prevent C. diff-associated diarrhea in patients taking antibiotics                                                         | <a href="http://www.essentialevidence.com">http://www.essentialevidence.com</a> |
| 2013        | Daily multivitamins do not reduce major CV events in men and do not affect mortality                                                  | <a href="http://www.essentialevidence.com">http://www.essentialevidence.com</a> |
| 2013        | Colchicine effective for first episode of acute pericarditis                                                                          | <a href="http://www.essentialevidence.com">http://www.essentialevidence.com</a> |
| <b>2014</b> | <b>Niacin doesn't improve outcomes in patients with vascular disease</b>                                                              | <a href="http://www.essentialevidence.com">http://www.essentialevidence.com</a> |
| 2014        | Surgery ineffective for non-traumatic partial medial meniscus tear                                                                    | <a href="http://www.essentialevidence.com">http://www.essentialevidence.com</a> |
| 2014        | Aspirin in low doses decreases preeclampsia risk                                                                                      | <a href="http://www.essentialevidence.com">http://www.essentialevidence.com</a> |
| 2014        | Varenicline plus nicotine replacement therapy more effective than varenicline alone                                                   | <a href="http://www.essentialevidence.com">http://www.essentialevidence.com</a> |
| 2014        | CBT plus amitriptyline optimal for chronic migraine in children and adolescents                                                       | <a href="http://www.essentialevidence.com">http://www.essentialevidence.com</a> |
| <b>2015</b> | <b>Steroids beneficial as adjunctive treatment for community-acquired pneumonia</b>                                                   | <a href="http://www.essentialevidence.com">http://www.essentialevidence.com</a> |
| 2015        | Post-MI beta-blockers do not decrease mortality                                                                                       | <a href="http://www.essentialevidence.com">http://www.essentialevidence.com</a> |
| 2015        | Many patients with uncomplicated acute appendicitis do well with antibiotic therapy                                                   | <a href="http://www.essentialevidence.com">http://www.essentialevidence.com</a> |
| 2015        | Naproxen alone may be best for acute low back pain                                                                                    | <a href="http://www.essentialevidence.com">http://www.essentialevidence.com</a> |
| 2015        | Clopidogrel + aspirin superior to aspirin alone following TIA or minor stroke                                                         | <a href="http://www.essentialevidence.com">http://www.essentialevidence.com</a> |
| <b>2016</b> | <b>Active surveillance for localized prostate cancer: no increased mortality, but higher rates of clinical progression ( ProtecT)</b> | <a href="http://www.essentialevidence.com">http://www.essentialevidence.com</a> |
| 2016        | Liraglutide reduces mortality (NNT = 71) in patients with T2DM and very high CV risk                                                  | <a href="http://www.essentialevidence.com">http://www.essentialevidence.com</a> |
| 2016        | CPAP doesn't reduce cardiovascular events (RICCADSA)                                                                                  | <a href="http://www.essentialevidence.com">http://www.essentialevidence.com</a> |
| 2016        | Trim-sulfa improves cure rate for cutaneous skin abscess after incision and drainage                                                  | <a href="http://www.essentialevidence.com">http://www.essentialevidence.com</a> |
| 2016        | Dilute apple juice at least as good as electrolytes for children with mild gastroenteritis                                            | <a href="http://www.essentialevidence.com">http://www.essentialevidence.com</a> |
| <b>2017</b> | <b>Semaglutide reduces CV events in high-risk patients with T2DM</b>                                                                  | <a href="http://www.essentialevidence.com">http://www.essentialevidence.com</a> |
| 2017        | Steroid injections ineffective for knee osteoarthritis                                                                                | <a href="http://www.essentialevidence.com">http://www.essentialevidence.com</a> |
| 2017        | Lipid treatment for primary prevention not effective in older adults                                                                  | <a href="http://www.essentialevidence.com">http://www.essentialevidence.com</a> |
| 2017        | Personal sound amplification works as well as a hearing aid at 20% of the cost                                                        | <a href="http://www.essentialevidence.com">http://www.essentialevidence.com</a> |
| 2017        | Aspirin started early in pregnancy reduces risk of preeclampsia and IUGR                                                              | <a href="http://www.essentialevidence.com">http://www.essentialevidence.com</a> |
